# Supplementary material for: A Proteomics-Driven Machine Learning Tool for Distinguishing ET from pre-PMF
Source: Research Square preprint supplement (doi:10.21203/rs.3.rs-7128322/v1), 2025-07-23
Supplement: Supplementary file 1 [file e30329eeaf2a1144dff2d2cc.docx]

**A Proteomics-Driven Machine Learning Tool for Distinguishing ET from pre-PMF**

Qing Wen1, 2, *, Ting Sun1, 2, * , Dandan Yu1, 2, Mankai Ju1, 2, Xiaofan Liu1, 2, Huiyuan Li1, 2, Rongfeng Fu1, 2, Wei Liu1, 2, Feng Xue1, 2, Huan Dong1, 2, Xinyue Dai1, 2, Wentian Wang1, 2, Ying Chi1, 2, Renchi Yang1, 2,Yunfei Chen🖂 1, 2 and Lei Zhang🖂 1, 2, 3

1 State Key Laboratory of Experimental Hematology, National Clinical Research Center for Blood Diseases, Haihe Laboratory of Cell Ecosystem, Tianjin Key Laboratory of Gene Therapy for Blood Diseases, CAMS Key Laboratory of Gene Therapy for Blood Diseases, Institute of Hematology & Blood Diseases Hospital, Chinese Academy of Medical Sciences & Peking Union Medical College, Tianjin 300020, China.

2 Tianjin Institutes of Health Science, Tianjin 301600, China.

3 School of Population Medicine and Public Health, Chinese Academy of Medical Sciences and Peking Union Medical College, Beijing 100730, China.

* Qing Wen and Ting Sun contributed equally as co-first authors.

Correspondence

Lei Zhang and Yunfei Chen, State Key Laboratory of Experimental Hematology, National Clinical Research Center for Blood Diseases, Haihe Laboratory of Cell Ecosystem, Institute of Hematology & Blood Diseases Hospital, Chinese Academy of Medical Sciences & Peking Union Medical College, Tianjin Key Laboratory of Gene Therapy for Blood Diseases, CAMS Key Laboratory of Gene Therapy for Blood Diseases, Tianjin 300020, China.

Email: zhanglei1@ihcams.ac.cn and chenyunfei@ihcams.ac.cn

**Supplementary Methods**

**1. Protein Extraction and LC-MS/MS Workflow**

Bone marrow FFPE tissue sections (5 μm thick) were deparaffinized with xylene and rehydrated through a graded ethanol series. Protein extraction was performed using pressure cycling technology with lysis buffer (8 M urea, 1% SDS, protease inhibitor cocktail), followed by reduction with 10 mM DTT (56°C for 30 minutes) and alkylation with 20 mM iodoacetamide (30 minutes in the dark). Protein concentration was measured using a BCA assay. Tryptic digestion was performed overnight at 37°C using sequencing-grade modified trypsin at a 1:50 enzyme-to-protein ratio. Peptides were desalted using C18 cartridges and dried under vacuum. The dried peptides were reconstituted in 0.1% formic acid prior to LC-MS/MS analysis. Peptides were separated using an EASY-nLC 1200 system and analyzed on a Q Exactive HF-X mass spectrometer (Thermo Fisher Scientific) in data-independent acquisition (DIA) mode with a 120-minute gradient. Fixed isolation window widths of 8 m/z were used for MS/MS acquisition.

**2. DIA Data Processing and Normalization**

Raw DIA data were processed using Spectronaut (Biognosys AG, v15) with directDIA workflow. The default settings were applied for peptide identification and quantification. Protein-level intensities (Iij) were extracted from Spectronaut output.

To account for sample-specific intensity variation, intra-sample normalization was performed. Specifically, for each protein j in sample i, its normalized abundance Rij was computed by dividing its raw intensity by the median intensity of all proteins in that sample:

*Rij = Iij/Median (Ij)*

where R*ij* denotes the normalized abundance of protein *j* in sample *i*, and Median (I*i*) represents the median intensity across all proteins in sample *i*.

**3. Differential Expression and Enrichment Analysis**

Differential expression analysis between ET and pre-PMF was performed using Wilcoxon rank-sum test. Proteins with |log2FC| > 0.58 and p < 0.05 were considered differentially expressed. GO and KEGG enrichment analysis was performed using the "clusterProfiler" package (v4.6.2) in R. Significance of enrichment was calculated using p-values to determine whether DEPs were statistically overrepresented in specific functional categories compared to the total protein background (i.e., all identified proteins).The reference database was org.Hs.eg.db (human genome annotation).

**4. Machine Learning: Nested Cross-Validation and Feature Selection**

Model construction and evaluation were performed using nested 5-fold cross-validation. The outer loop was used to evaluate model performance, and the inner loop was used for feature selection and hyperparameter tuning. (1) Clinical model: included age, WBC, and LDH (fixed features from cohort 1). (2) Proteomic model: included all DEPs from cohort 2, with feature selection performed within each training fold. Within each fold, candidate protein features were ranked by mean decrease in Gini index using the randomForest package (v4.7-1.1). The top-ranked proteins were further refined using SVM-RFE (caret + e1071 packages), and optimal subsets were selected based on maximum cross-validated accuracy. After model evaluation, the two-step feature selection pipeline (random forest + SVM-RFE) was applied to the entire dataset in cohort 2 to construct a final 9-protein classifier. This panel was used for downstream interpretation and subgroup analysis only. The same machine learning framework was independently applied within the JAK2V617F and CALR mutation subgroups to identify subgroup-specific discriminatory proteins.

**Table S1 The baseline characteristics of ET and pre-PMF in cohort 2**

| **Characteristics** | **ET (n = 64)** | **pre-PMF (n = 21)** | **p value** |
| --- | --- | --- | --- |
| Male patients, n (%) | 27 (42.2) | 9 (42.9) | 0.957 |
| Age (years), median (range) | 54.48±10.86 | 60.29±10.09 | 0.034 |
| Age＞60 years, n (%) | 22 (34.4) | 13 (61.9) | 0.026 |
| Leukocytes (×109/L), median (range) | 9.32±3.11 | 11.66±6.14 | 0.106 |
| Leukocytes >10×109/L, n (%) | 17 (26.6) | 10 (47.6) | 0.072 |
| Hemoglobin (g/L), median (range) | 137.5±21.59 | 118.24±21.33 | 0.001 |
| Hemoglobin < 120g/L, n (%) | 10 (15.9) | 11 (52.4) | 0.001 |
| Platelets, (×109/L), median (range) | 780.37±282.72 | 1184.33±497.49 | 0.002 |
| Platelets > 450×109/L, n (%) | 58 (92.1) | 21 (100.0) | 0.325 |
| ALT (U/L), median (range) | 22.54±13.83 | 24.62±19.14 | 0.593 |
| AST (U/L), median (range) | 23.24±7.47 | 23.82±8.07 | 0.765 |
| LDH (U/L), median (range) | 244.61±84.36 | 290.05±84.78 | 0.038 |
| LDH >247 U/L, n (%) | 22 (34.4) | 14 (66.7) | 0.009 |
| Glucose (mmol/L), median (range) | 5.1±1.1 | 5.16±0.95 | 0.815 |
| Crea (umol/L), median (range) | 63.19±13.9 | 61.16±12.1 | 0.552 |
| Karyotype (abnormal/normal), n | 1/52 (1.9) | 2/14 (12.5) | 0.185 |
| Palpable splenomegaly, n (%) | 19/8 (70.4) | 7/4 (63.6) | 0.391 |
| **Driver mutations** |  |  |  |
| JAK2V617F | 41 (64.1) | 10 (47.6) | 0.327 |
| CALR | 13 (20.3) | 8 (38.1) |  |
| MPL | 1 (1.6) | 0 (0) |  |
| Negative | 9 (14.1) | 3 (14.3) |  |
| **Nondriver mutations** |  |  |  |
| **Epigenetic regulation** |  |  |  |
| DNMT3A, n (%) | 7 (10.9) | 2 (9.5) | 1.000 |
| TET2, n (%) | 6 (9.4) | 5 (23.8) | 0.130 |
| ASXL1, n (%) | 8 (12.5) | 2 (9.5) | 1.000 |
| KMT2D, n (%) | 4 (6.3) | 4 (19.0) | 0.099 |
| **Transcription factors** |  |  |  |
| TP53, n (%) | 1 (1.6) | 1 (4.8) | 0.435 |
| **RNA splicing** |  |  |  |
| SF3B1, n (%) | 2 (3.1) | 1 (4.8) | 1.000 |
| ZRSR2, n (%) | 3 (4.7) | 2 (9.5) | 0.593 |
| SRSF2, n (%) | 1 (1.6) | 1 (4.8) | 0.435 |
| U2AF1, n (%) | 1 (1.6) | 0 (0) | 1.000 |
| **Signaling pathway** |  |  |  |
| NRAS, n (%) | 0 (0) | 0 (0) | NA |
| SH2B3, n (%) | 0 (0) | 1 (4.8) | 0.247 |
| **Others** |  |  |  |
| NF1, n (%) | 1 (1.6) | 0 (0) | 1.000 |
| NFE2, n (%) | 0 (0) | 0 (0) | NA |

Abbreviation: ET, Essential Thrombocythemia; pre-PMF, pre-fibrotic Primary Myelofibrosis; ALT, Alanine Aminotransferase; AST, Aspartate Aminotransferase; LDH, Lactate Dehydrogenase; Crea, Creatinine; DNA2, Deoxyribonuclease 2; JAK2V617F, Janus Kinase 2; CALR, Calreticulin; MPL, Myeloproliferative Leukemia Virus Oncogene; DNMT3A, DNA Methyltransferase 3 Alpha; TET2, Tet Methylcytosine Dioxygenase 2; ASXL1, Additional Sex Combs-Like 1; KMT2D, Lysine Methyltransferase 2D; SF3B1, Splicing Factor 3B Subunit 1; TP53, Tumor Protein 53; NRAS, Neuroblastoma RAS Viral Oncogene Homolog; SH2B3, SH2B Adaptor Protein 3; NF1, Neurofibromin 1; NFE2, Nuclear Factor Erythroid 2.

**Table S2 The baseline characteristics of JAK2+ ET and pre-PMF in cohort 2**

| **Characteristics** | **ET (n = 41)** | **pre-PMF (n = 10)** | **p value** |
| --- | --- | --- | --- |
| Male patients, n (%) | 20 (48.8) | 6 (60.0) | 0.726 |
| Age (years), median (range) | 54.9±10.86 | 62.6±8.57 | 0.043 |
| Age＞60 years, n (%) | 15 (36.6) | 7 (70.0) | 0.079 |
| Leukocytes (×109/L), median (range) | 9.72±3.1 | 13.71±5.35 | 0.046 |
| Leukocytes >10×109/L, n (%) | 13 (31.7) | 7 (70.0) | 0.036 |
| Hemoglobin (g/L), median (range) | 141.68±20.74 | 121±25.95 | 0.01 |
| Hemoglobin < 120g/L, n (%) | 3 (7.5) | 5 (50.0) | 0.005 |
| Platelets, (×109/L), median (range) | 736.58±260.06 | 954.3±401.04 | 0.04 |
| Platelets > 450×109/L, n (%) | 37 (90.2) | 10 (100.0) | 0.573 |
| ALT (U/L), median (range) | 22.17±13.65 | 26.07±23.68 | 0.494 |
| AST (U/L), median (range) | 22.74±7.54 | 24.17±8.68 | 0.605 |
| LDH (U/L), median (range) | 234.85±80.11 | 310.7±105.74 | 0.017 |
| LDH >247 U/L, n (%) | 14 (34.1) | 8 (80.0) | 0.013 |
| Glucose (mmol/L), median (range) | 5.08±1.27 | 5.11±0.8 | 0.944 |
| Crea (umol/L), median (range) | 66.01±14.85 | 63.85±12.64 | 0.675 |
| Karyotype (abnormal/normal), n | 1/37 | 2/6 | 0.058 |
| Palpable splenomegaly, n (%) | 6 (14.6) | 2 (20.0) | 0.367 |
| **Driver mutations** |  |  |  |
| JAK2 burden | 29.58±22.03 | 40.85±25.57 | 0.166 |
| **Nondriver mutations** |  |  |  |
| **Epigenetic regulation** |  |  |  |
| DNMT3A, n (%) | 5 (12.2) | 1 (10.0) | 1.000 |
| TET2, n (%) | 5 (12.2) | 2 (20.0) | 0.612 |
| ASXL1, n (%) | 7 (17.1) | 1 (10.0) | 1.000 |
| KMT2D, n (%) | 3 (7.3) | 3 (30.0) | 0.081 |
| **Transcription factors** |  |  |  |
| TP53, n (%) | 0 (0) | 1 (10.0) | 0.196 |
| **RNA splicing** |  |  |  |
| SF3B1, n (%) | 2 (4.9) | 1 (10.0) | 0.488 |
| ZRSR2, n (%) | 3 (7.3) | 0 (0) | 1.000 |
| SRSF2, n (%) | 1 (2.4) | 0 (0) | 1.000 |
| U2AF1, n (%) | 0 (0) | 0 (0) | NA |
| **Signaling pathway** |  |  |  |
| NRAS, n (%) | 0 (0) | 0 (0) | NA |
| SH2B3, n (%) | 0 (0) | 1 (10.0) | 0.196 |
| **Others** |  |  |  |
| NF1, n (%) | 1 (2.4) | 0 (0) | 1.000 |
| NFE2, n (%) | 0 (0) | 0 (0) | NA |

Abbreviation: ET, Essential Thrombocythemia; pre-PMF, pre-fibrotic Primary Myelofibrosis; ALT, Alanine Aminotransferase; AST, Aspartate Aminotransferase; LDH, Lactate Dehydrogenase; Crea, Creatinine; DNA2, Deoxyribonuclease 2; JAK2, Janus Kinase 2; CALR, Calreticulin; MPL, Myeloproliferative Leukemia Virus Oncogene; DNMT3A, DNA Methyltransferase 3 Alpha; TET2, Tet Methylcytosine Dioxygenase 2; ASXL1, Additional Sex Combs-Like 1; KMT2D, Lysine Methyltransferase 2D; SF3B1, Splicing Factor 3B Subunit 1; TP53, Tumor Protein 53; NRAS, Neuroblastoma RAS Viral Oncogene Homolog; SH2B3, SH2B Adaptor Protein 3; NF1, Neurofibromin 1; NFE2, Nuclear Factor Erythroid 2.

**Table S3 The baseline characteristics of CARL+ ET and pre-PMF in cohort 2**

| **Characteristics** | **ET (n = 13)** | **pre-PMF (n = 8)** | **p value** |
| --- | --- | --- | --- |
| Male patients, n (%) | 4 (30.8) | 2 (25.0) | 1.000 |
| Age (years), median (range) | 53.23±13.13 | 58.75±13.17 | 0.362 |
| Age＞60 years, n (%) | 4 (30.8) | 5 (62.5) | 0.203 |
| Leukocytes (×109/L), median (range) | 8.52±3.45 | 9.02±3.95 | 0.767 |
| Leukocytes >10×109/L, n (%) | 3 (23.1) | 2 (25.0) | 1.000 |
| Hemoglobin (g/L), median (range) | 126.75±20.06 | 120±11.98 | 0.406 |
| Hemoglobin < 120g/L, n (%) | 5 (38.5) | 4 (50.0) | 0.673 |
| Platelets, (×109/L), median (range) | 958.67±367.35 | 1201±329.41 | 0.143 |
| Platelets > 450×109/L, n (%) | 11 (91.7) | 8 (100.0) | 1.000 |
| ALT (U/L), median (range) | 27.25±17.39 | 17.75±7.32 | 0.126 |
| AST (U/L), median (range) | 27.06±8.26 | 21.48±6.9 | 0.138 |
| LDH (U/L), median (range) | 286.25±116.56 | 250.53±55.93 | 0.436 |
| LDH >247 U/L, n (%) | 4 (30.8) | 3 (37.5) | 1.000 |
| Glucose (mmol/L), median (range) | 5.28±0.84 | 5.07±1.21 | 0.664 |
| Crea (umol/L), median (range) | 59.18±12.04 | 57.75±10.87 | 0.793 |
| Karyotype (abnormal/normal), n | 0/10 | 0/6 | 1.000 |
| Palpable splenomegaly, n (%) | 2 (15.4) | 1 (12.5) | 0.237 |
| **Driver mutations** |  |  |  |
| CARL burden | 30.9±16.42 | 40.34±15.11 | 0.204 |
| **Nondriver mutations** |  |  |  |
| **Epigenetic regulation** |  |  |  |
| DNMT3A, n (%) | 1 (7.7) | 0 (0) | 1.000 |
| TET2, n (%) | 1 (7.7) | 3 (37.5) | 0.253 |
| ASXL1, n (%) | 1 (7.7) | 0 (0) | 1.000 |
| KMT2D, n (%) | 1 (7.7) | 0 (0) | 1.000 |
| **Transcription factors** |  |  |  |
| TP53, n (%) | 1 (7.7) | 0 (0) | 1.000 |
| **RNA splicing** |  |  |  |
| SF3B1, n (%) | 0 (0) | 0 (0) | NA |
| ZRSR2, n (%) | 0 (0) | 2 (25.0) | 0.133 |
| SRSF2, n (%) | 0 (0) | 0 (0) | NA |
| U2AF1, n (%) | 1 (7.7) | 0 (0) | 1.000 |
| **Signaling pathway** |  |  |  |
| NRAS, n (%) | 0 (0) | 0 (0) | NA |
| SH2B3, n (%) | 0 (0) | 0 (0) | NA |
| **Others** |  |  |  |
| NF1, n (%) | 0 (0) | 0 (0) | NA |
| NFE2, n (%) | 0 (0) | 0 (0) | NA |

Abbreviation: ET, Essential Thrombocythemia; pre-PMF, pre-fibrotic Primary Myelofibrosis; ALT, Alanine Aminotransferase; AST, Aspartate Aminotransferase; LDH, Lactate Dehydrogenase; Crea, Creatinine; DNA2, Deoxyribonuclease 2; JAK2, Janus Kinase 2; CALR, Calreticulin; MPL, Myeloproliferative Leukemia Virus Oncogene; DNMT3A, DNA Methyltransferase 3 Alpha; TET2, Tet Methylcytosine Dioxygenase 2; ASXL1, Additional Sex Combs-Like 1; KMT2D, Lysine Methyltransferase 2D; SF3B1, Splicing Factor 3B Subunit 1; TP53, Tumor Protein 53; NRAS, Neuroblastoma RAS Viral Oncogene Homolog; SH2B3, SH2B Adaptor Protein 3; NF1, Neurofibromin 1; NFE2, Nuclear Factor Erythroid 2.

**Table S4 Performance metrics of nested cross-validation based on proteomic, clinical, and combined features for distinguishing ET from pre-PMF**

| **Model** | **Accuracy** | **Sensitivity** | **Specificity** | **F1** |
| --- | --- | --- | --- | --- |
| Protein | 0.812 | 0.476 | 0.922 | 0.556 |
| Clinical | 0.729 | 0 | 0.969 | NA |
| Combined | 0.8 | 0.524 | 0.891 | 0.564 |

Abbreviations: ET: essential thrombocythemia; pre-PMF: pre-fibrotic primary myelofibrosis; AUC: area under the curve; CV: cross-validation; F1: F1 score (harmonic mean of precision and sensitivity); Sensitivity: true positive rate; Specificity: true negative rate.

**Table S5 List of the 9 selected proteins used for SVM-RFE model construction**

| **Uniprot ID** | **Gene Symbol** | **log2FC** | **p-value** | **Full Protein Name** |
| --- | --- | --- | --- | --- |
| Q8IW93 | ARHGEF19 | 0.702 | 0.004 | Rho guanine nucleotide exchange factor 19 |
| E9PSG1 | CAST | 0.607 | 0.000 | Calpastatin |
| R4GMN3 | SFTPA2 | 5.504 | 3.094E-06 | Surfactant protein A2 |
| C9JNG9 | COL6A3 | 1.272 | 0.002 | Collagen type VI alpha 3 chain |
| P12074 | COX6A1 | -1.622 | 8.168E-06 | Cytochrome c oxidase subunit 6A1 |
| P51530 | DNA2 | 2.017 | 2.697E-06 | DNA replication ATP-dependent helicase/nuclease DNA2 |
| Q8TCC3 | MRPL30 | -0.586 | 0.000 | Large ribosomal subunit protein uL30m |
| Q9NY97 | B3GNT2 | -1.860 | 0.013 | N-acetyllactosaminide beta-1,3-N-acetylglucosaminyltransferase 2 |
| Q96Q06 | PLIN4 | 0.702 | 0.004 | Perilipin-4 |


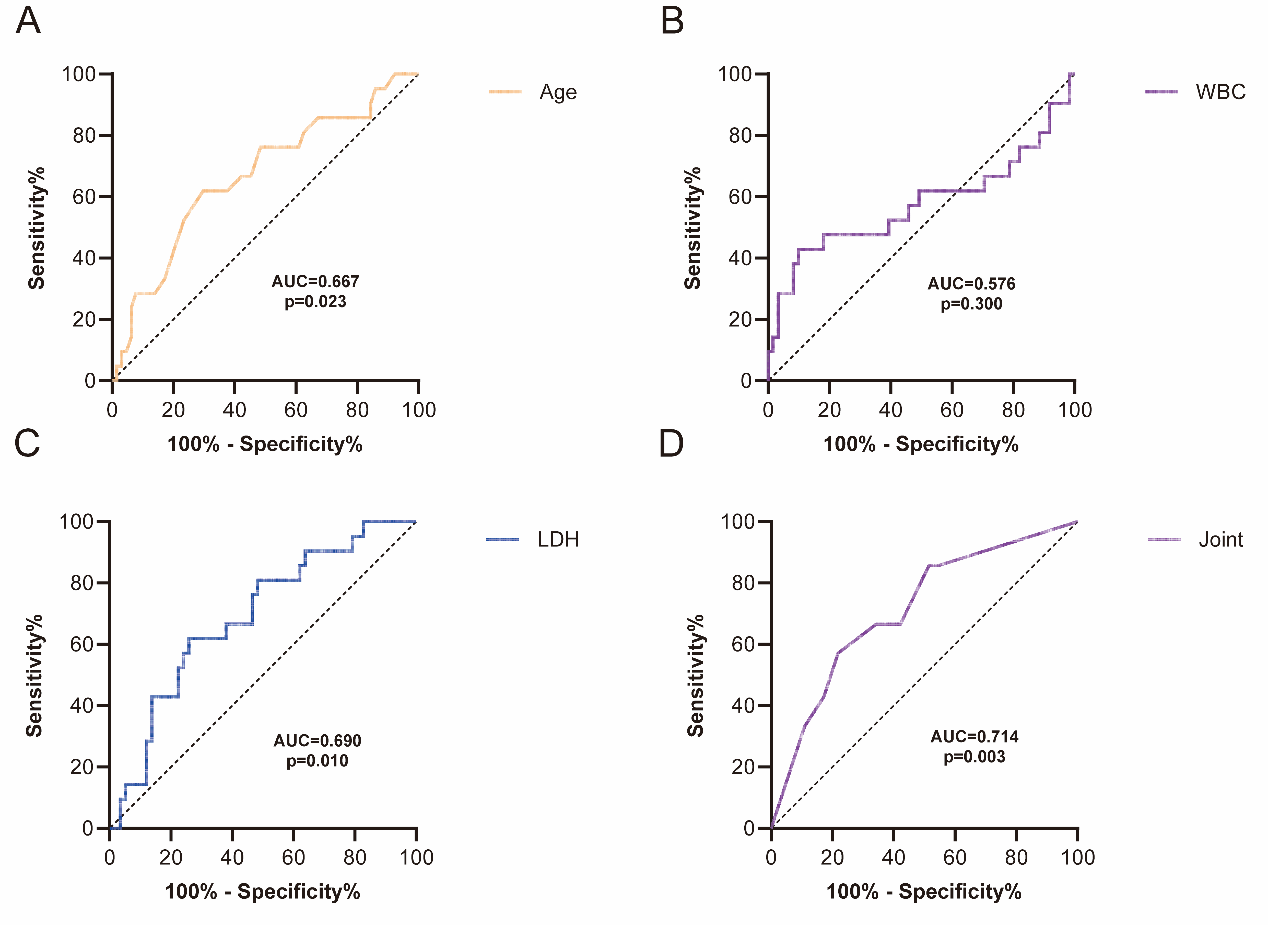


**Figure S1** Receiver operator characteristic curves analysis of age (A), WBC (B), LDH (C) and combined age, WBC, and LDH (D) in distinguishing ET from pre-PMF in cohort 2.

WBC, white blood cell; LDH, lactate dehydrogenase; ET, essential thrombocythemia; Pre-PMF, prefibrotic primary myelofibrosis; AUC, area under the curve.


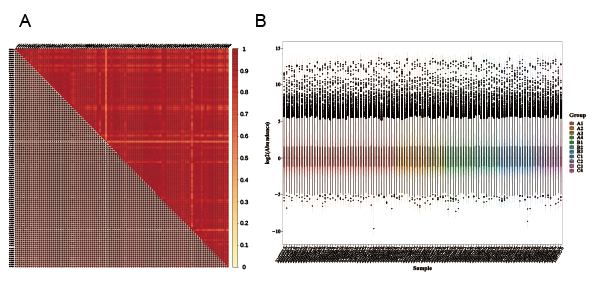


**Figure S2** Protein expression data quality control: sample correlation matrix (A) and sample-wise intensity distribution (B).


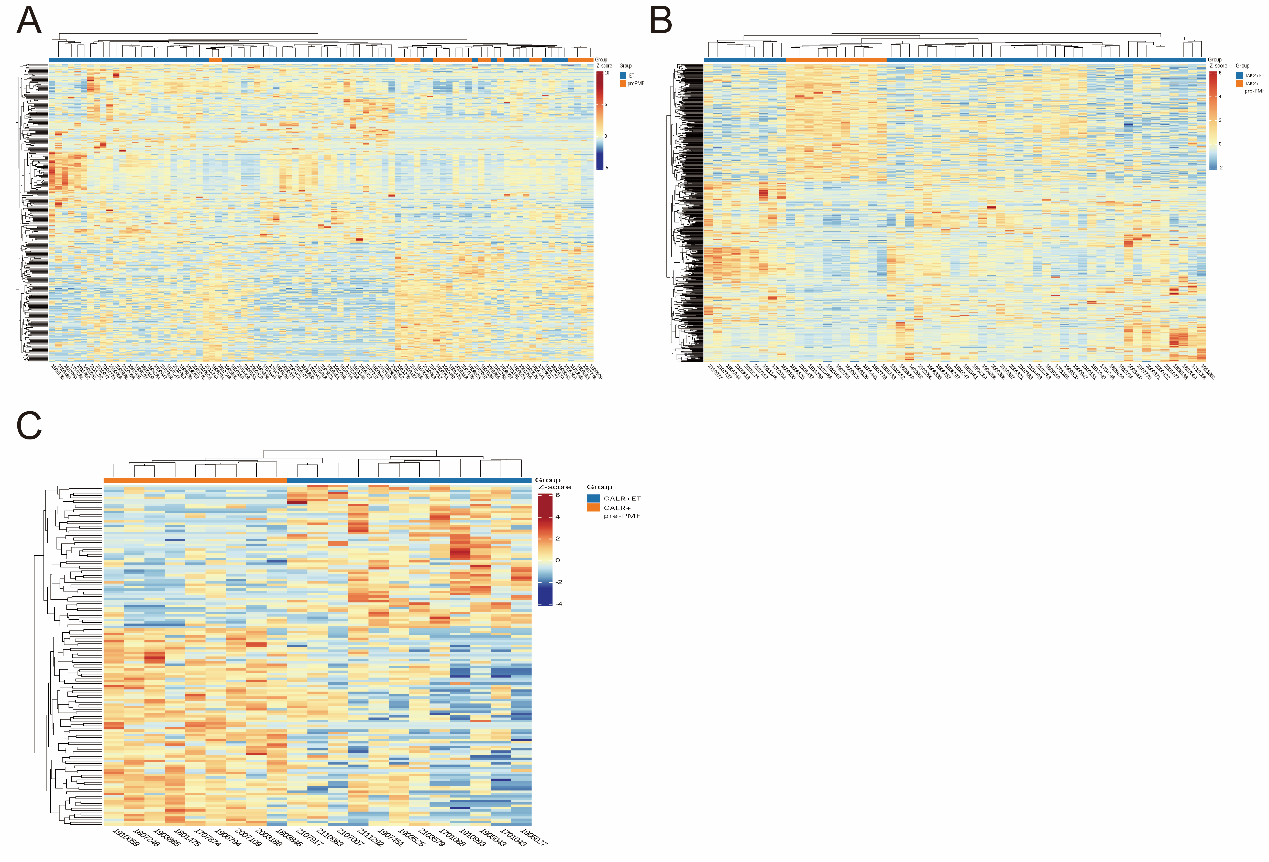


**Figure S3** Heatmap of differentially expressed proteins in ET and pre-PMF patients. (A) Heatmap showing the clustering of ET and pre-PMF groups based on proteomic expression; (B) Heatmap of JAK2+ subgroups (ET vs. pre-PMF) with hierarchical clustering; (C) Heatmap of CALR+ subgroups (ET vs. pre-PMF) showing distinct protein expression patterns.

**
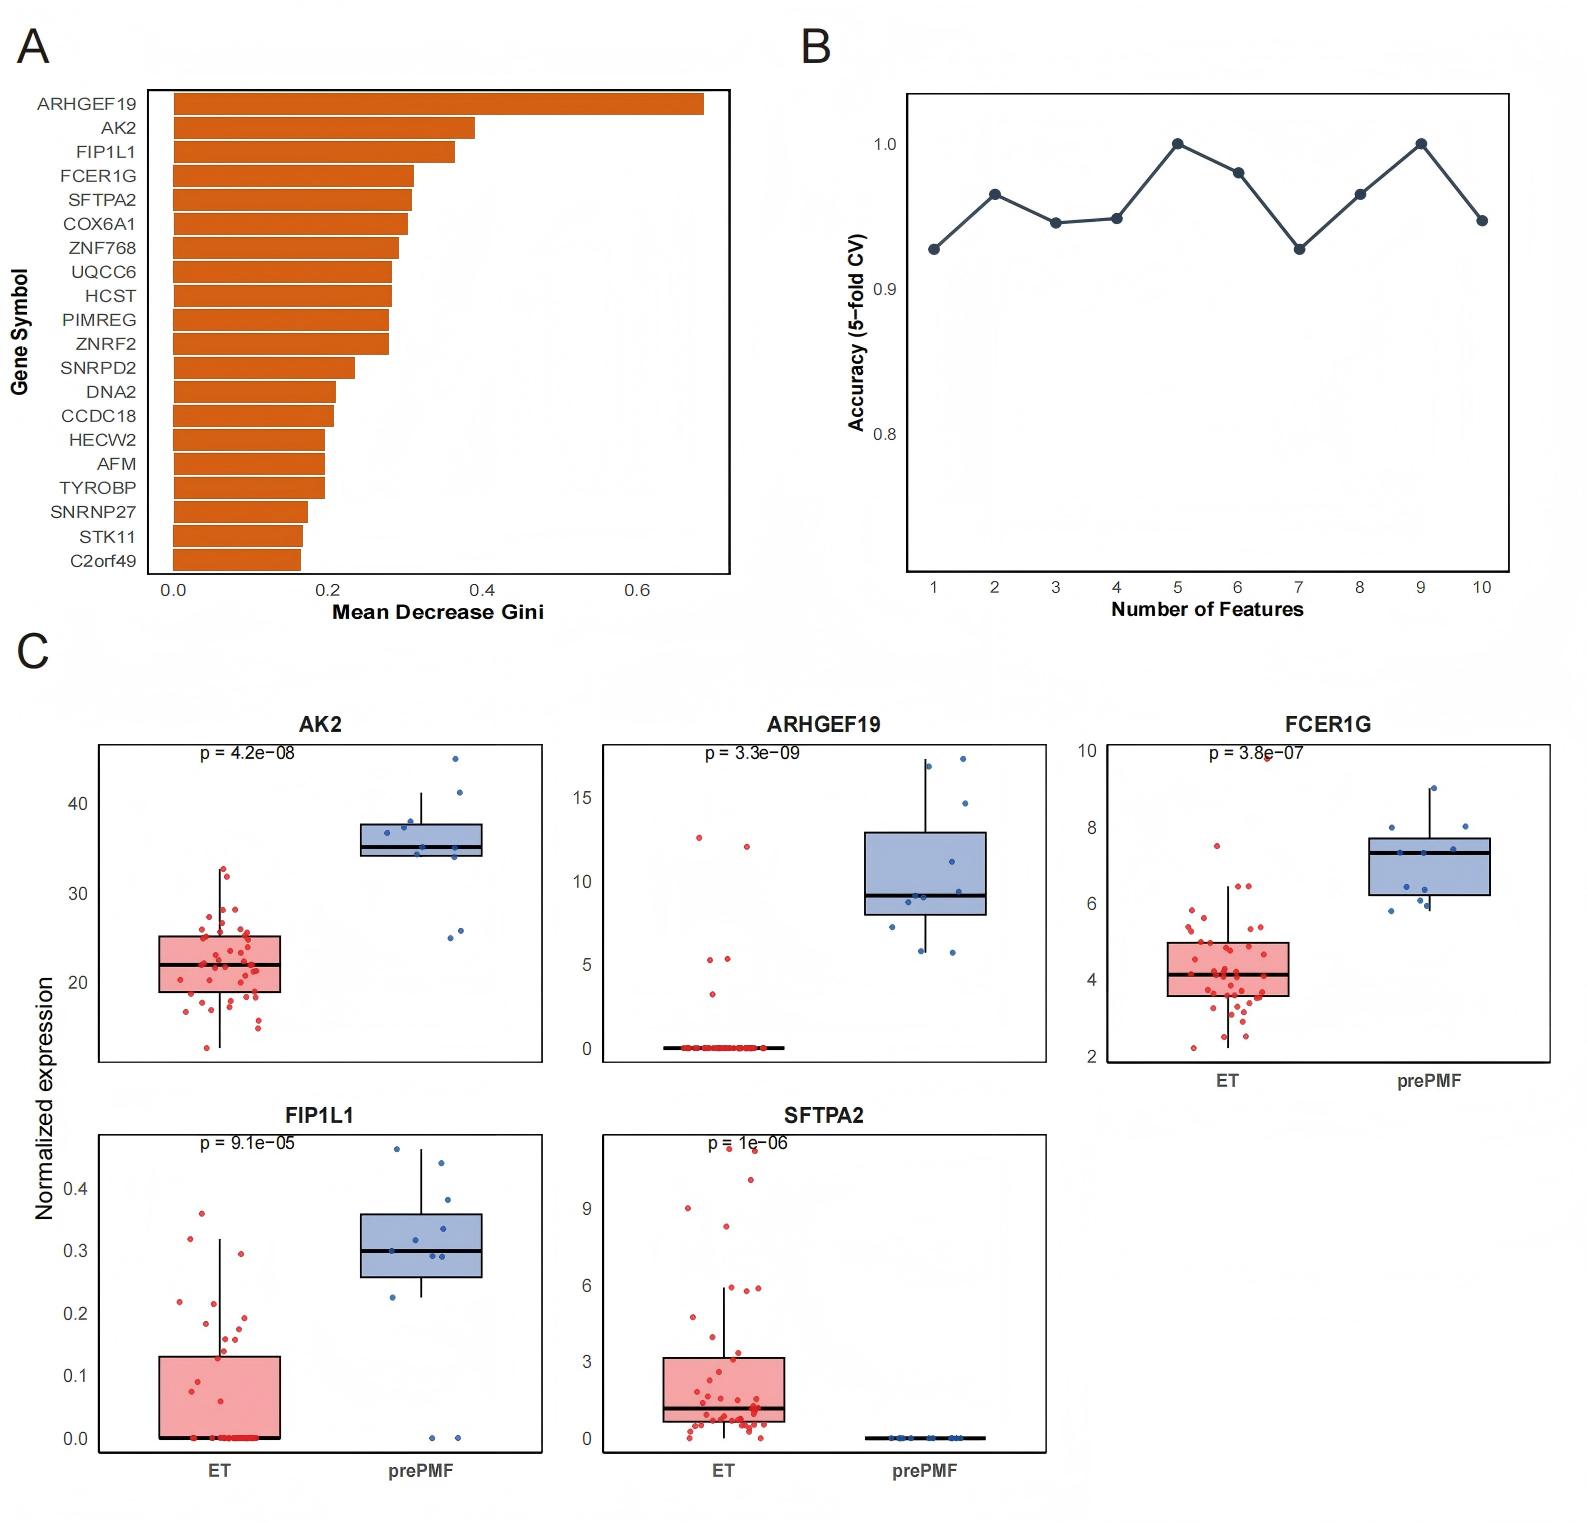
**

**Figure S4** Identification of diagnostic protein markers in the JAK2V617F+ subgroup. (A) Top 20 most important proteins ranked by Mean Decrease Gini using random forest in the JAK2V617F+ subgroup; (B) SVM-RFE feature selection curve showing the classification accuracy across different numbers of protein features; (C) Expression profiles of the top 5 selected proteins (AK2, ARHGEF19, FCER1G, FIP1L1, and SFTPA2) showing significant differences between ET and pre-PMF (Wilcoxon test).


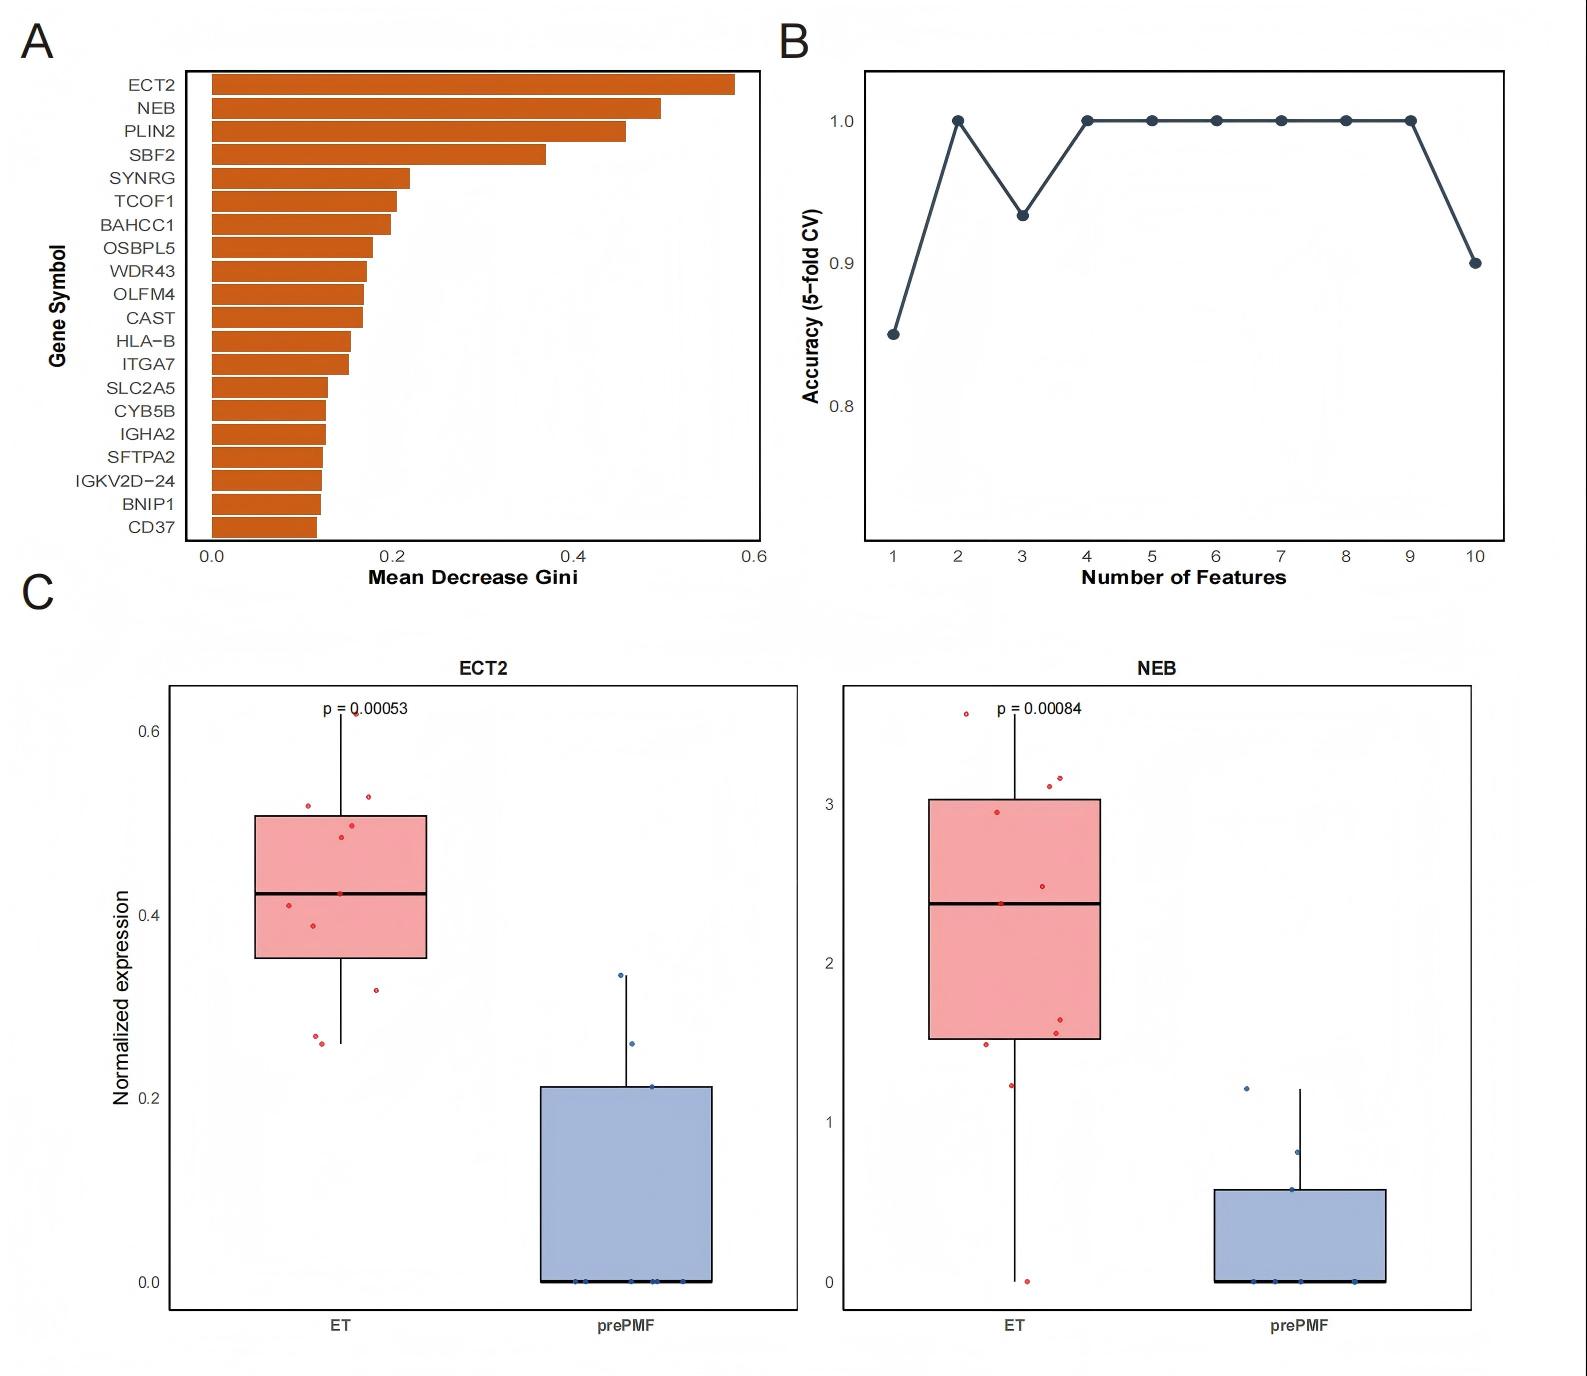


**Figure S5** Identification of diagnostic protein markers in the CALR+ subgroup. (A) Top 20 most important proteins ranked by Mean Decrease Gini using random forest in the CALR+ subgroup; (B) SVM-RFE feature selection curve showing 5-fold cross-validation accuracy across different numbers of protein features; (C) Expression comparison of the top 2 selected proteins (ECT2 and NEB) between ET and pre-PMF in the CALR+ subgroup (Wilcoxon test).
